# Supplementary material for: Use of resuscitation promoting factors to screen for tuberculosis infection in household-exposed children in The Gambia
Source: Springer Nature journal article supplement (doi:10.1186/s12879-020-05194-1), 2020-07-02
Supplement: MOESM1 [file 18142428]

# Use of Resuscitation promoting factors to screen for tuberculosis infection in household-exposed children in The Gambia

## Additional File 1

W van Loon<sup>1,\*</sup>, MP Gomez<sup>2</sup>, D Jobe<sup>2</sup>, KLMC Franken<sup>3</sup>, THM Ottenhoff<sup>3</sup>, M Coninx<sup>2</sup>, L Kestens<sup>4,5</sup>, JS Sutherland<sup>2</sup>, B Kampmann<sup>2,6</sup>, LD Tientcheu<sup>2,7,8,\*</sup>

<sup>1</sup> Institute of Tropical Medicine and International Health, Charité-University Medicine Berlin, Berlin, Germany.

<sup>2</sup> Vaccines and Immunity Theme, MRC Unit The Gambia at London School of Hygiene & Tropical Medicine, Fajara, The Gambia.

<sup>3</sup> Department of Infectious Diseases, Leiden University Medical Center, Leiden, The Netherlands.

<sup>4</sup> Immunology Department, Institute of Tropical Medicine Antwerp, Antwerp, Belgium.

<sup>5</sup> Faculty of Pharmaceutical, Biomedical and Veterinary Sciences, University of Antwerp, Antwerp, Belgium.

<sup>6</sup> The Vaccine Centre, Faculty of Infectious & Tropical Diseases, London School of Hygiene & Tropical Medicine, London, UK

<sup>7</sup> Department of Biochemistry, Faculty of Science, University of Yaoundé 1, Yaoundé, Cameroon

<sup>8</sup> Department of Infection Biology, Faculty of Infectious and Tropical Diseases, London School of Hygiene & Tropical Medicine, London, UK

### \* Correspondence:

Welmoed van Loon; welmoed.vanloon@gmail.com

Dr. Leopold D. Tientcheu; ltientcheu@mrc.gm

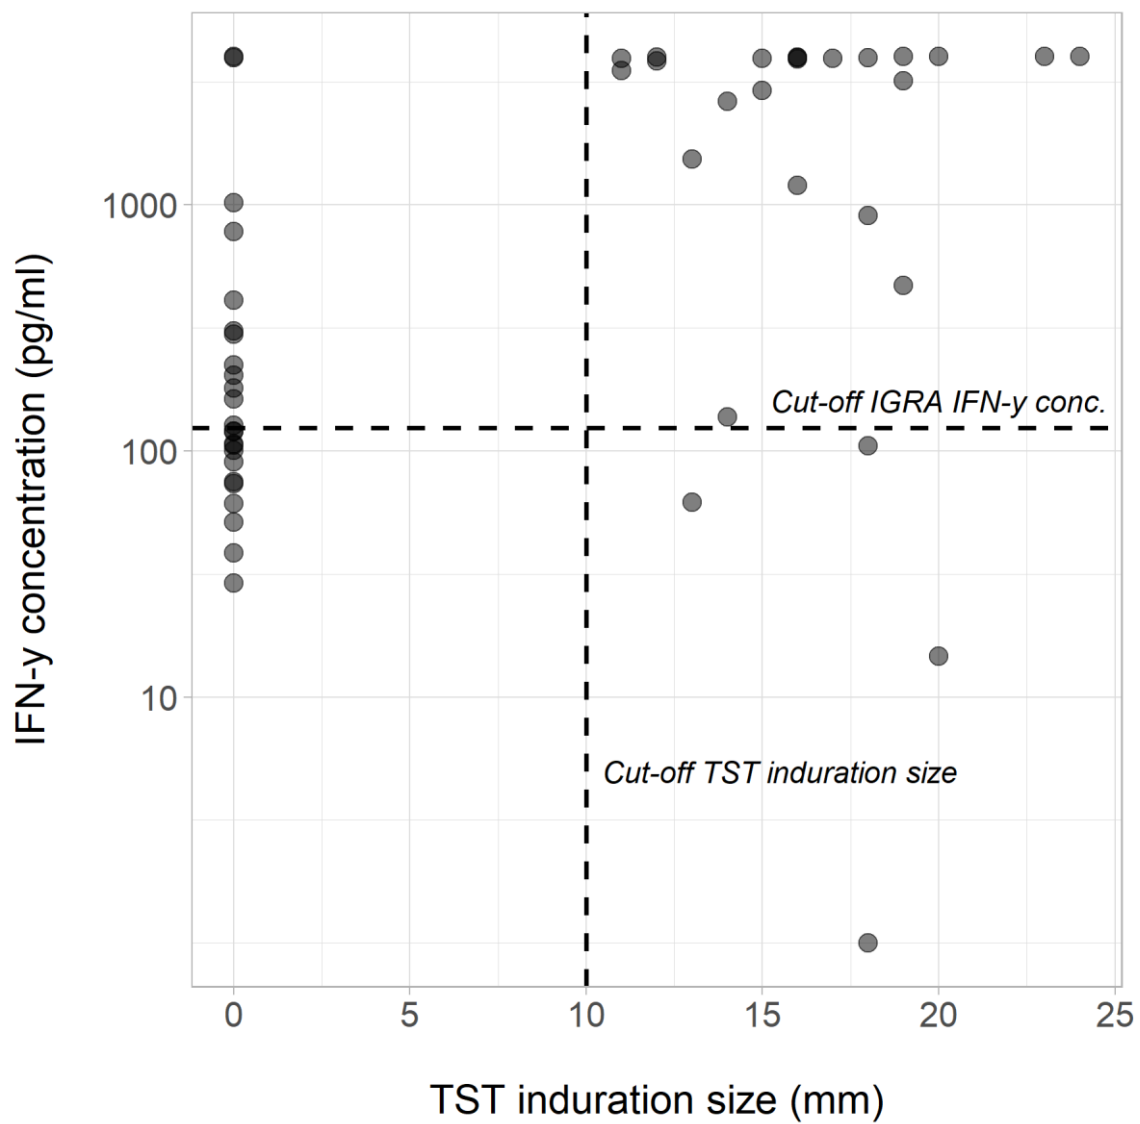

**Supplementary Figure 1. TST induration size *versus* IGRA with EC-fusion protein.**

IFN- $\gamma$  concentrations were corrected for the background signal (value of unstimulated IFN- $\gamma$  level subtracted) and all values above 4000 were set to 4000 pg/mL. TST induration size and IFN- $\gamma$  were significantly correlated (Spearman's  $\rho$  0.4;  $P = 0.0006$ ). TST = Tuberculin skin test, IGRA = IFN- $\gamma$  release assay, EC = ESAT-6/CFP-10.

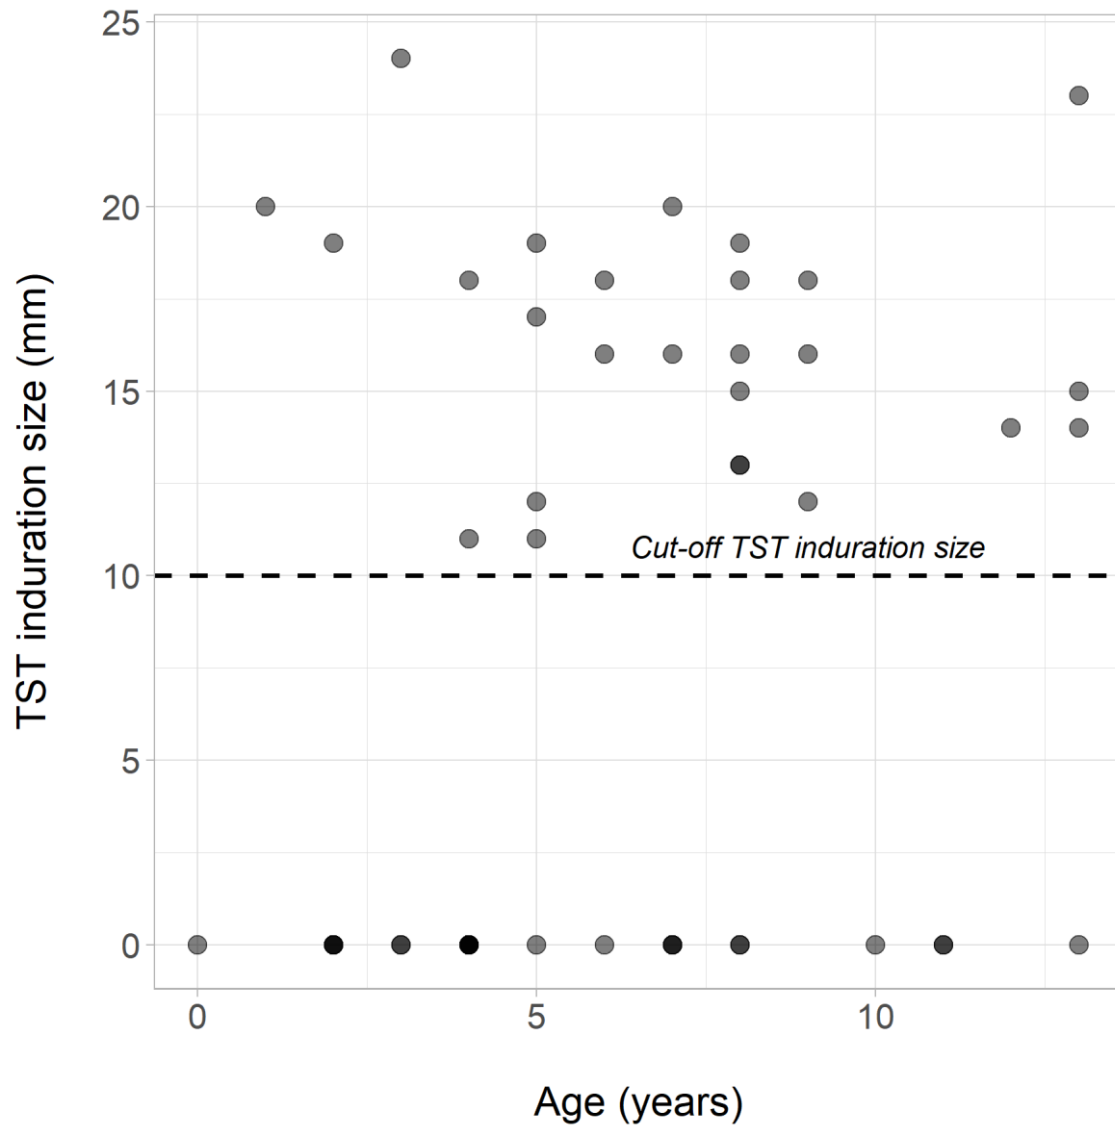

**Supplementary Figure 2. TST induration size *versus* age.**

TST+ children were significantly older than TST- children (median 7.5 (IQR 5.0-8.8) years versus 4.0 (IQR 3.0-7.3) years;  $P = 0.05$ ). TST = Tuberculin skin test.

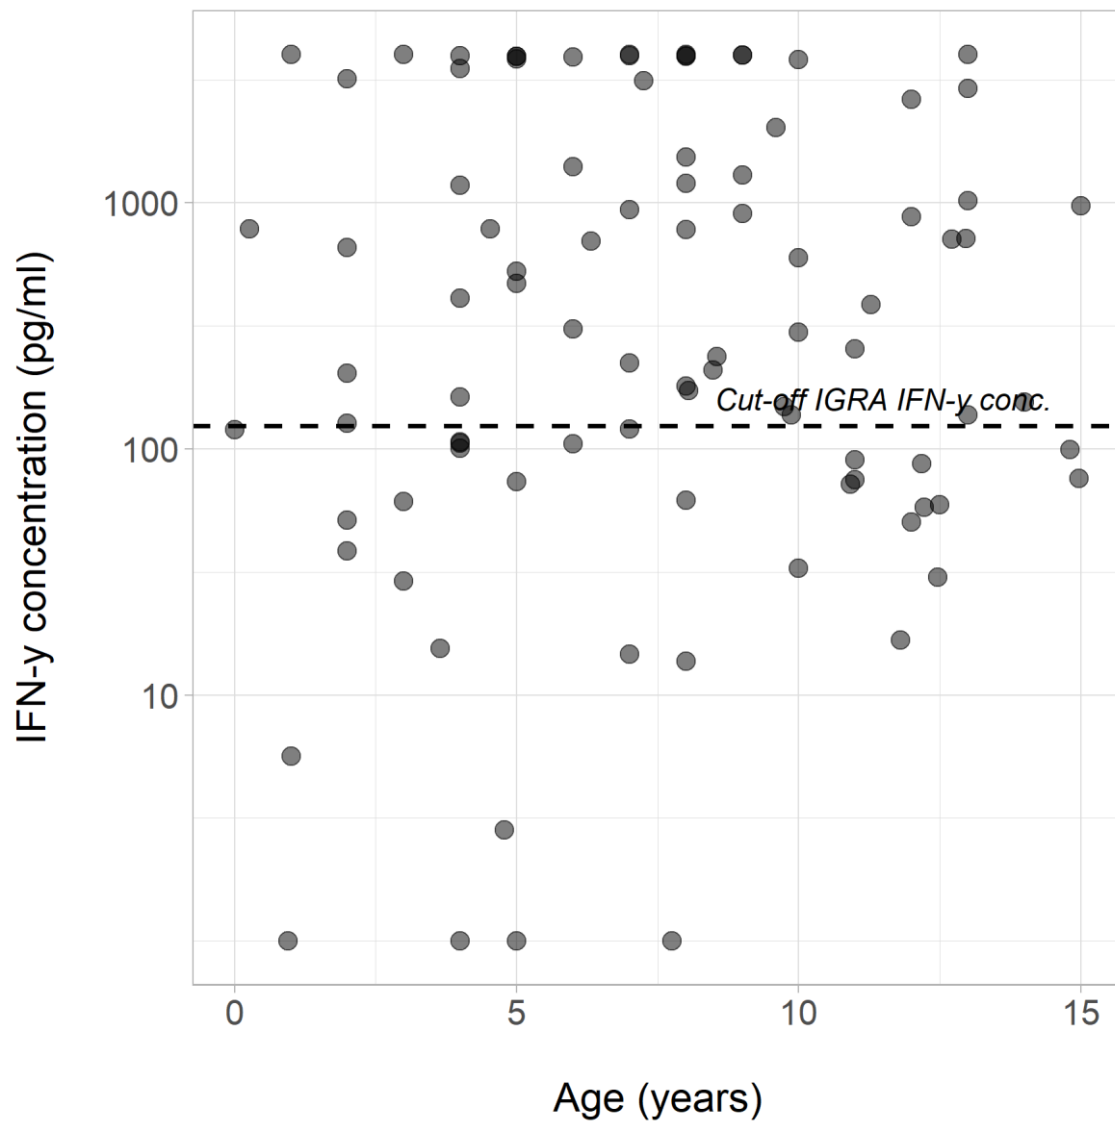

**Supplementary Figure 3. IGRA with EC-fusion protein *versus* age.**

IGRA+ children were tended to be older than IGRA- children (median 8.0 (IQR 5.0-10.0) years versus median 4.5 (IQR 3.0-8.0) years;  $P = 0.06$ ). IGRA = IFN- $\gamma$  release assay, EC = ESAT-6/CFP-10.

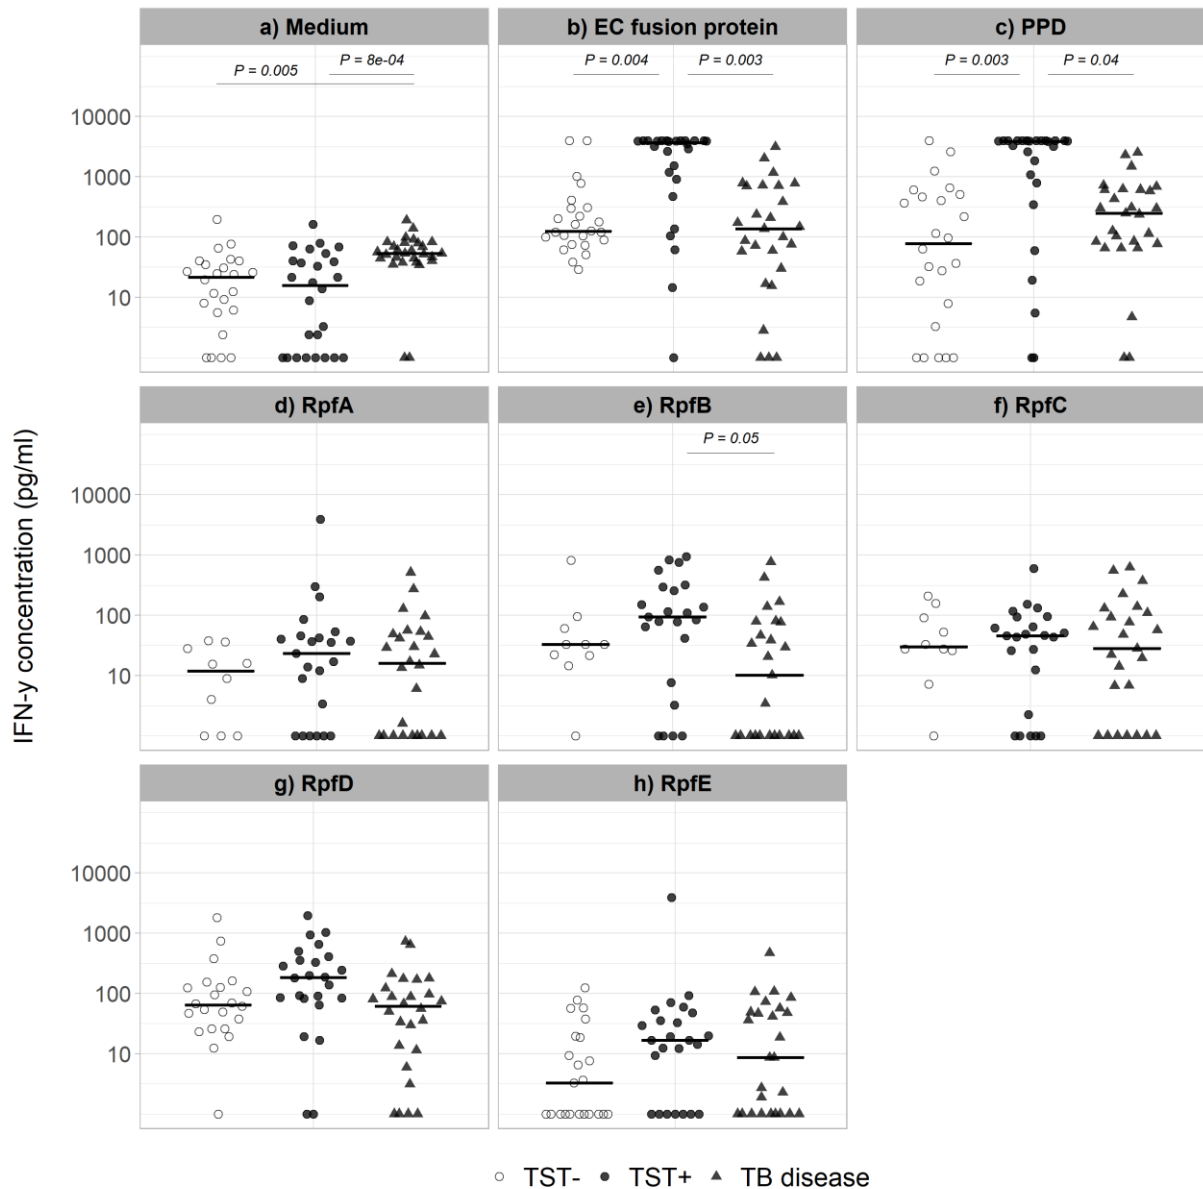

**Supplementary Figure 4. IFN- $\gamma$  response after *ex vivo* whole blood antigen stimulation using TST as reference standard for MTBC infection.**

TST+ participants (filled circle) were classified as infected and TST- participants (open circle) were classified as uninfected. The first panel (a) “medium” depicts the results of the unstimulated assays, i.e., the background level. The other panels (b – h) represent the respective antigen-stimulated assays. Solid lines: median IFN- $\gamma$  values per infection category. IFN- $\gamma$  concentrations were corrected for the background signal (value of unstimulated IFN- $\gamma$  level subtracted), except for the results in the first panel “medium”. All values above 4000 were set to 4000 pg/mL. P-values below 0.05 indicated. P-values were derived from logistic regression models including possible confounders age and sex, after log-transformation of the IFN- $\gamma$  variable. EC = Esat-6/CFP-10, PPD = Purified protein derivative, Rpf = Resuscitation promoting factor, TST= Tuberculin skin test.

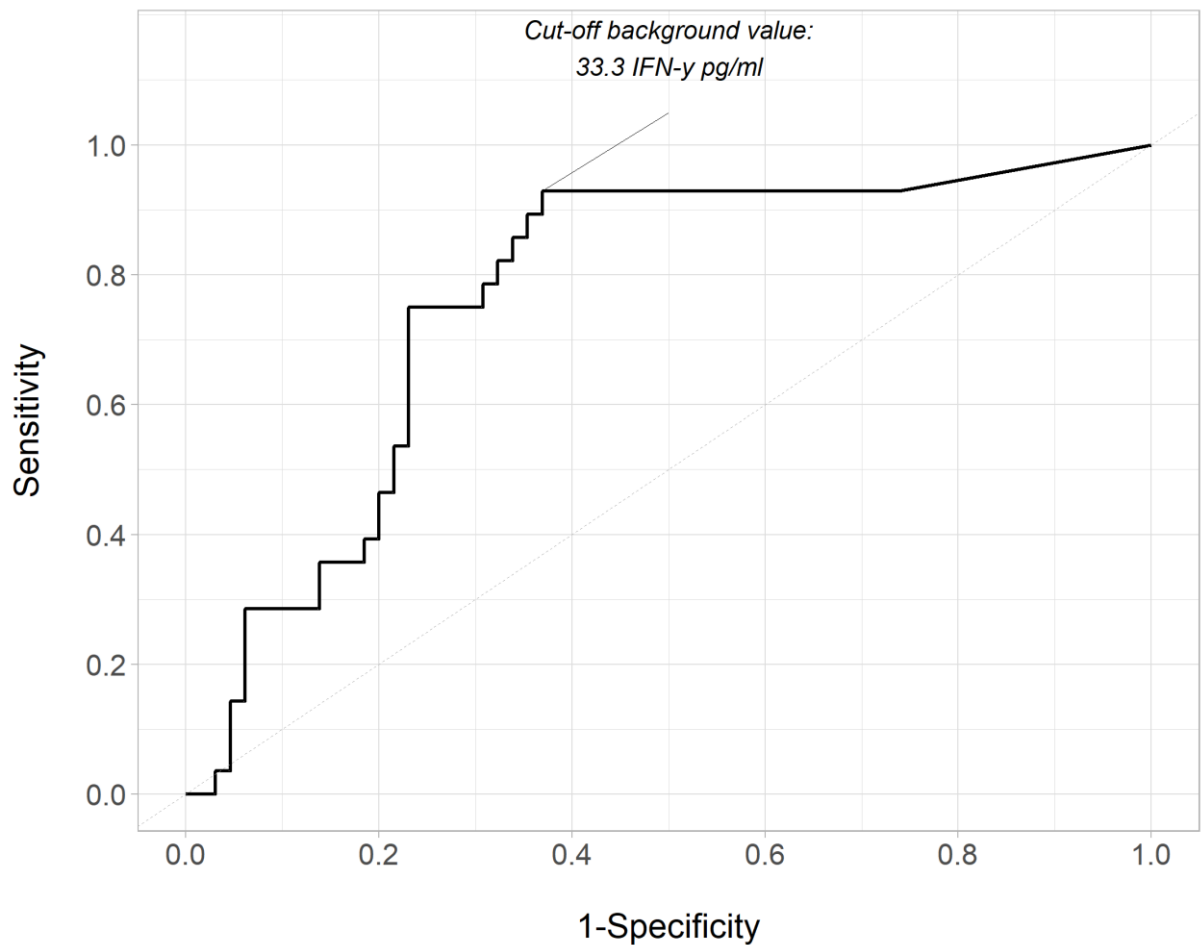

**Supplementary Figure 5. ROC-curve for background (*i.e.*, unstimulated) IFN- $\gamma$  level for diagnosis of TB disease.**

TB disease was diagnosed by mycobacterial confirmation and/or clinical diagnosis.

Participants without TB disease could still be infected or symptomatic. AUC is 0.77 Cut-off value for IFN- $\gamma$  level was based on the Youden Index. The cut-off was set to 33.3 and led to 92.9% sensitivity and 63.1% specificity. ROC = Receiver operating curve, AUC = area under the curve.
